# Supplementary material
Source: PubMed Central journal article supplement (PMC3494948)
Supplement: 1210882109_pnas.201210882SI.pdf [file 1210882109_pnas.201210882SI.pdf]

# Supporting Information

Holland et al. 10.1073/pnas.1210882109

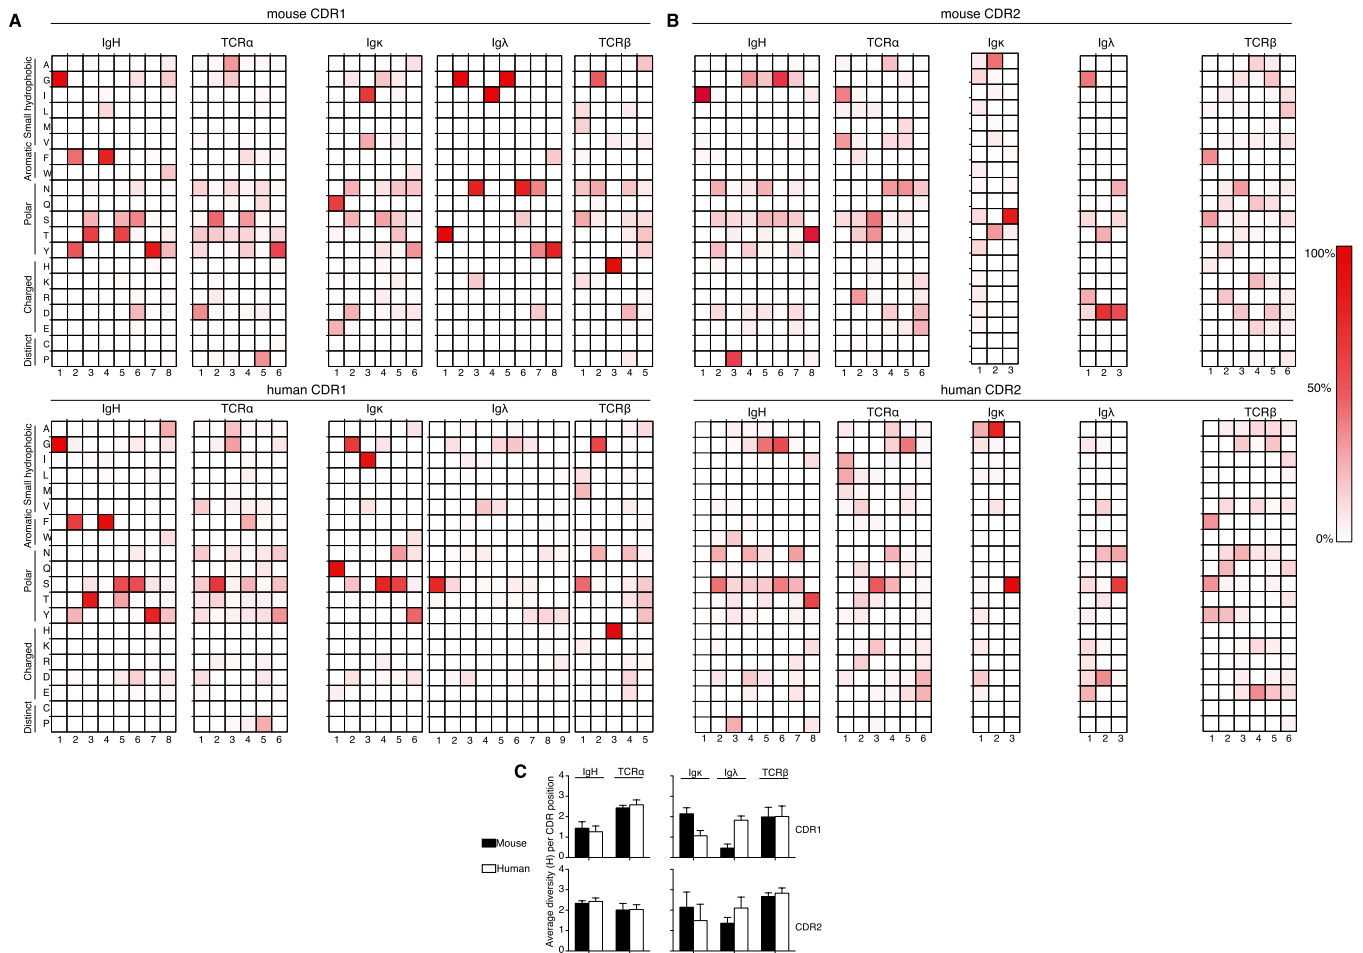

**Fig. S1.** Amino acid use within germ-line complementarity determining regions (CDRs) of mouse and human T-cell receptor (TCR) and Ig variable gene segments. CDR1 (A) and CDR2 (B) are shown. The percentage use of each amino acid at each position is represented by color intensity. Amino acids are grouped according to their chemical properties as indicated on the y axis. Variable (V)-segments that encode CDRs of the most common length out of the total number present in the genome were analyzed. (C) Diversity (H) values for each CDR (using the most common length) were calculated using Shannon entropy analysis in conjunction with the Protein Variability Server for each position. Error bars represent SEM. Sequences are from ImMunoGeneTics ([www.imgt.org](http://www.imgt.org)).









Table S1. Cont.

| Construct | Peptide   | CDR length | Nucleotide (no. of sequences)      |
|-----------|-----------|------------|------------------------------------|
|           | FRSGAP    | 6          | TTTCGATCGGGAGCTCCT (1)             |
|           | FRSQAP    | 6          | TTTCGAAGCCAAGCTCCT (1)             |
|           |           |            | TTTCGAAGTCAAGCTCCT (3)             |
|           |           |            | TTTCGATCACAAGCTCCT (1)             |
|           |           |            | TTTCGATCTCAAGCTCCT (1)             |
|           |           |            | TTTCGTAGTCAAGCTCCT (1)             |
|           | FRTGAP    | 6          | TTTCGAACGGGGGCTCCT (1)             |
|           | FRVQAP    | 6          | TTTCGGGTGCAAGCTCCT (13)            |
|           | FRVRAP    | 6          | TTTCGGGTCCGGGCTCCT (1)             |
|           | FRYQAP    | 6          | TTTCGGTATCAAGCTCCT (3)             |
|           | FTWQAP    | 6          | TTTACGTGGCAAGCTCCT (1)             |
|           | HLRGAP    | 6          | CACCTCAGGGGCGCTCCT (1)             |
|           | LRNRAP    | 6          | CTTCGAAATCGGGCTCCT (1)             |
|           | STLQAP    | 6          | TCGACCTTGCAAGCTCCT (1)             |
|           | FQTQAP    | 7          | TTCCAACGCAAGCTCCT (1)              |
|           | FRGMQAP   | 7          | TTTCGAGGGATGCAAGCTCCT (1)          |
|           | FRKGQAP   | 7          | TTTCGAAAGGGCAAGCTCCT (1)           |
|           | FRKKKAP   | 7          | TTTCGAAAAAAAAAAGCTCCT (1)          |
|           | FRNIGAP   | 7          | TTTCGAAATATAGGGGCTCCT (1)          |
|           | FRNSQAP   | 7          | TTTCGTAAGTCTCAAGCTCCT (2)          |
|           | FRNSRTP   | 7          | TTTCGAAATAGTAGGACTCCT (1)          |
|           | FRNTGAP   | 7          | TTTCGAAATACGGGAGCTCCT (3)          |
|           | FRRGKAP   | 7          | TTTCGAAGGGGAAAGCTCCT (3)           |
|           | FRTDGAP   | 7          | TTTCGAACAGACGGAGCTCCT (2)          |
|           | FRIHPQAP  | 8          | TTTCGAATCCACCCTCAAGCTCCT (1)       |
|           | FRIPGAP   | 8          | TTTCGAATCCGGGGGGGCTCCT (1)         |
|           | FRNGLQAP  | 8          | TTTCGAAATGGGGTTCGAAGCTCCT (1)      |
|           | FRNIPGAP  | 8          | TTTCGAAATATCCAGGGGCTCCT (1)        |
|           | FRNIRGAP  | 8          | TTTCGAAATATAAGGGGAGCTCCT (2)       |
|           | FRNISKAP  | 8          | TTTCGAAATATTTCCAAGCTCCT (2)        |
|           | FRNIVGAP  | 8          | TTTCGAAATATCGTAGGGGCTCCT (3)       |
|           | FRNPLRAP  | 8          | TTTCGAAATCCCTTGGGAGCTCCT (1)       |
|           | FRTPLQAP  | 8          | TTTCGAACCCCTTTGCAAGCTCCT (2)       |
|           | FRTSLQAP  | 8          | TTTCGAACCTCCCTCCAAGCTCCT (2)       |
|           | FLTSTLQAP | 9          | TTCCCTGACTTCGACCTTGCAAGCTCCT (1)   |
|           | FRKRPLQAP | 10         | TTTCGAAAGAGACCCCTCCAACAAGCTCCT (6) |
| CDR1 WT   | SGHHV     | 5          | TCAGGACACCACGTT (5)                |
|           | SGHKV     | 5          | TCAGGACATAAGGTT (2)                |
|           | SGHNV     | 5          | TCAGGACATAATGTT (2)                |
|           | SGHRV     | 5          | TCAGGACATAGAGTT (3)                |
|           |           |            | TCAGGACATAGGGTT (6)                |
|           | SGHSR     | 5          | TCAGGACATAGTCCG (1)                |
|           | SGHSV     | 5          | TCAGGACATAGTGTT (5)                |
|           | SGHTV     | 5          | TCAGGACATACCGTT (1)                |
|           | SGLHV     | 5          | TCAGGACTCCACGTT (1)                |
|           | SGQAV     | 5          | TCAGGACAAGCTGTT (2)                |
|           |           |            | TCAGGACAGGCTGTT (1)                |
|           | SGQNV     | 5          | TCAGGACAAAATGTT (2)                |
|           | SGRHA     | 5          | TCAGGACGCCATGCT (1)                |
|           | SRRAV     | 5          | TCACGTCGAGCTGTT (1)                |
|           | CIIVAV    | 6          | TGTATCATTGTGGCTGTT (1)             |
|           | CNIVAV    | 6          | TGTAACATTGTGGCTGTT (1)             |
|           | SGHFAV    | 6          | AGTGGACATTTTGTCTGTT (1)            |
|           | SGHHAV    | 6          | TCAGGACACCACGCTGTT (3)             |
|           | SGHNGV    | 6          | TCAGGACATAACGGTGT (2)              |
|           | SGHNHV    | 6          | TCAGGACATAACCATGTT (1)             |
|           | SGHPAV    | 6          | TCAGGACATCCCGCTGTT (1)             |
|           | SGHRAV    | 6          | TCAGGACATAGAGCTGTT (1)             |
|           |           |            | TCAGGACATAGAGCTGTT (22)            |
|           |           |            | TCAGGACATAGGGCTGTT (6)             |
|           | SGHRDV    | 6          | TCAGGACATAGAGATGTT (1)             |
|           |           |            | TCAGGACATAGGGATGTT (1)             |
|           | SGHRGV    | 6          | TCAGGACATAGAGGTGTT (2)             |
|           | SGHRV     | 6          | TCAGGACATAGAAGTGT (2)              |

Table S1. Cont.

| Construct     | Peptide       | CDR length              | Nucleotide (no. of sequences) |
|---------------|---------------|-------------------------|-------------------------------|
| CDR1 $\Delta$ |               |                         | TCAGGACATAGATCTGTT (5)        |
|               |               |                         | TCAGGACATAGGTCTGTT (1)        |
|               | SGHRTV        | 6                       | TCAGGACATAGAAGTCTGTT (1)      |
|               | SGHRWV        | 6                       | TCAGGACATAGATGGGTT (1)        |
|               | <b>SGHSAV</b> | <b>6</b>                | <b>TCAGGACATAGCGCTGTT (2)</b> |
|               |               |                         | TCAGGACATTCCGCTGTT (1)        |
|               | SGHSGV        | 6                       | TCAGGACATAGTGGGTT (4)         |
|               | SGHSHV        | 6                       | TCAGGACATTCCCATGTT (1)        |
|               | SGHSKV        | 6                       | TCAGGACATAGTAAAGTT (1)        |
|               | SGHSNV        | 6                       | TCAGGACATAGTAATGTT (1)        |
|               | SGHSRV        | 6                       | TCAGGACATAGCCGGGTT (1)        |
|               |               |                         | TCAGGACATAGTAGGGTT (4)        |
|               |               |                         | TCAGGACATAGTCGCGTT (4)        |
|               | SGHSSV        | 6                       | TCAGGACATAGTAGTGT (1)         |
|               | SGHSTV        | 6                       | TCAGGACATAGTACCGTT (4)        |
|               |               |                         | TCAGGACATAGTACTGTT (6)        |
|               | SGHTAV        | 6                       | TCAGGACATACCGCTGTT (2)        |
|               | SGLCVF        | 6                       | TCAGGACTTTGTGTTTTC (1)        |
|               | SGQIRV        | 6                       | TCAGGACAAATCCGTT (2)          |
|               | SGQNEV        | 6                       | TCAGGACAGAACGAGTT (1)         |
|               | SGQTSV        | 6                       | TCAGGACAAACCTCTGTT (2)        |
|               | SGSPDV        | 6                       | TCAGGATCCCCTGACGTT (3)        |
|               | SGSRAV        | 6                       | TCAGGATCTCGCGCTGTT (1)        |
|               | SADGV         | 5                       | TCGGCAGACGGAGTT (1)           |
|               | SAFGV         | 5                       | TCAGCATTGGAGTT (1)            |
|               | SAGRV         | 5                       | TCGGCAGGTCGAGTT (1)           |
|               | LAEGGV        | 6                       | TTGGCAGAGGGAGGAGTT (1)        |
|               | LAGSVV        | 6                       | TTGGCAGGATCAGTAGTT (1)        |
|               | SAEGGV        | 6                       | TCGGCAGAGGGAGGAGTT (12)       |
|               | SAESGV        | 6                       | TCGGCAGAATCAGGAGTT (2)        |
|               | SAEVGV        | 6                       | TCGGCAGAGGTAGGAGTT (1)        |
|               | SAFFRF        | 6                       | TCGGCATTTCAGAGTT (1)          |
|               | SAFLGV        | 6                       | TCGGCATTTCAGGAGTT (1)         |
|               | SAFSGF        | 6                       | TCTGCATTTTCAGGATTT (1)        |
|               | SAFSVF        | 6                       | TCGGCATTTCAGTATTT (1)         |
|               | <b>SAGAGV</b> | <b>6</b>                | <b>TCGGCAGGGCAGGAGTT (3)</b>  |
|               | SAGFGV        | 6                       | TCGGCAGGATTTGGGTT (2)         |
|               | SAGLKF        | 6                       | TCGGCAGGTTTAAAATTT (1)        |
|               | SAGLKV        | 6                       | TCGGCAGGTTTAAAAGTT (1)        |
|               | SAGLRV        | 6                       | TCGGCAGGATGAGAGTT (1)         |
|               | SAGRGV        | 6                       | TCGGCAGGAAGGGGAGTT (3)        |
|               | SAGSGV        | 6                       | TCGGCAGGATCAGGAGTT (7)        |
|               |               |                         | TCGGCAGGATCCGGAGTT (3)        |
|               |               |                         | TCGGCAGGATCGGGAGTT (7)        |
|               |               |                         | TCGGCAGGATCTGGAGTT (5)        |
|               |               |                         | TCGGCAGGATCTGGGTT (2)         |
|               |               |                         | TCTGCAGGATCAGGAGTT (1)        |
|               |               |                         | TCTGCAGGATCTGGAGTT (1)        |
|               | SAGSKL        | 6                       | TCGGCAGGATCAAAACTT (1)        |
|               | SAGSKV        | 6                       | TCGGCAGGATCAAAAAGTT (8)       |
|               |               |                         | TCGGCAGGATCGAAAAGTT (3)       |
|               | SAGSRV        | 6                       | TCGGCAGGATCAAGAGTT (7)        |
|               |               | TCGGCAGGATCCAGAGTT (4)  |                               |
|               |               | TCGGCAGGATCCCGGTT (3)   |                               |
|               |               | TCGGCAGGATCGAGAGTT (2)  |                               |
|               |               | TCGGCAGGATCGAGGGTT (1)  |                               |
|               |               | TCGGCAGGATCTCGAGTT (1)  |                               |
| SAGSSV        | 6             | TCGGCAGGATCAAGTGT (2)   |                               |
| SAGSVV        | 6             | TCGGCAGGATCAGTAGTT (16) |                               |
| SALFRV        | 6             | TCGGCATTATTCAGAGTT (1)  |                               |
| SAVGGV        | 6             | TCGGCAGTTGGAGGAGTT (1)  |                               |
| SGSPGV        | 6             | TCGGGGAGTCCGGGAGTT (1)  |                               |
| VADVGV        | 6             | GTCGCAGATGTAGGAGTT (1)  |                               |

Sequences shaded in gray represent regeneration of the original complementarity determining region (CDR) template sequence.
